# Supplementary material
Source: PubMed Central journal article supplement (PMC3319430)
Supplement: NIHMS365287-supplement-Figures_tables.pdf [file NIHMS365287-supplement-Figures_tables.pdf]

**NANOMOLAR POTENCY PYRIMIDO-PYRROLO-QUINOXALINEDIONE CFTR  
INHIBITOR REDUCES CYST SIZE IN A POLYCYSTIC KIDNEY DISEASE MODEL**

Lukmanee Tradtrantip, N.D. Sonawane, Wan Namkung and A.S. Verkman

**Supporting material table of contents**

|                                                                                                      |         |
|------------------------------------------------------------------------------------------------------|---------|
| 1. <sup>1</sup> H nmr, <sup>13</sup> C nmr, and mass spectra of 2, 3, 4, 5, 6, PPQ-102, and PPQ-102B | S2-S11  |
| 2. Structures and activity of PPQ-102 analogs tested                                                 | S12-S20 |

## Low resolution mass spectrum of compound 2

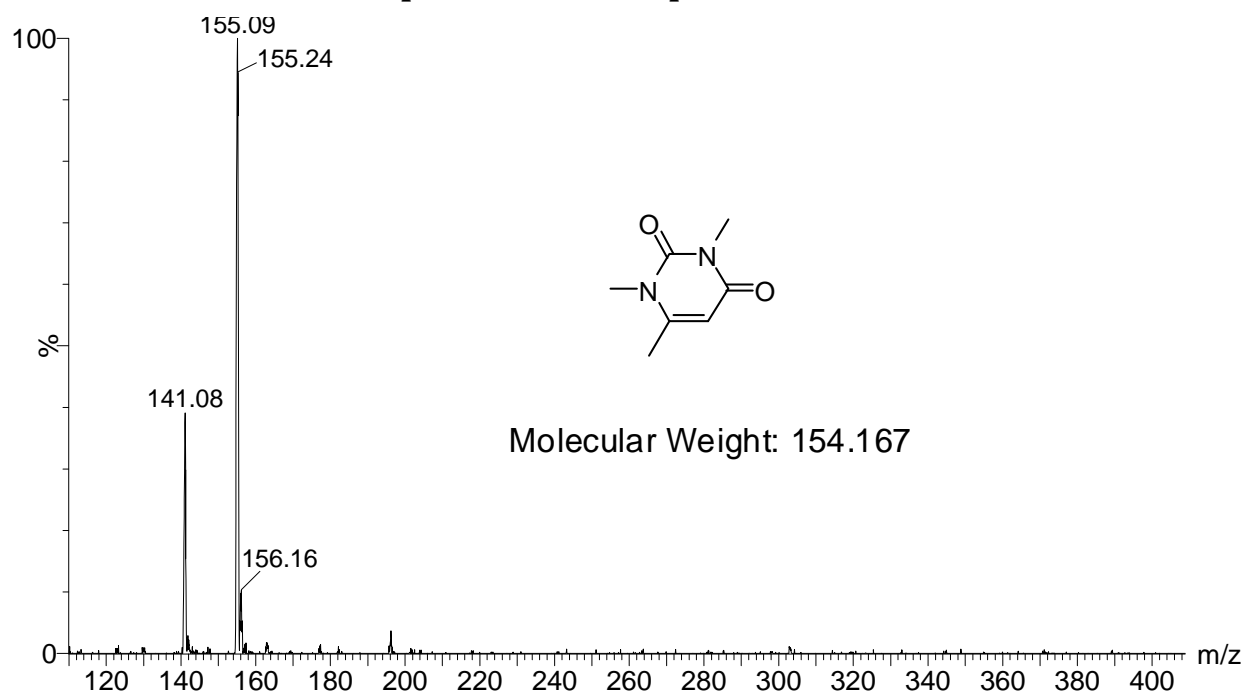

## <sup>1</sup>H nmr spectrum of compound 2

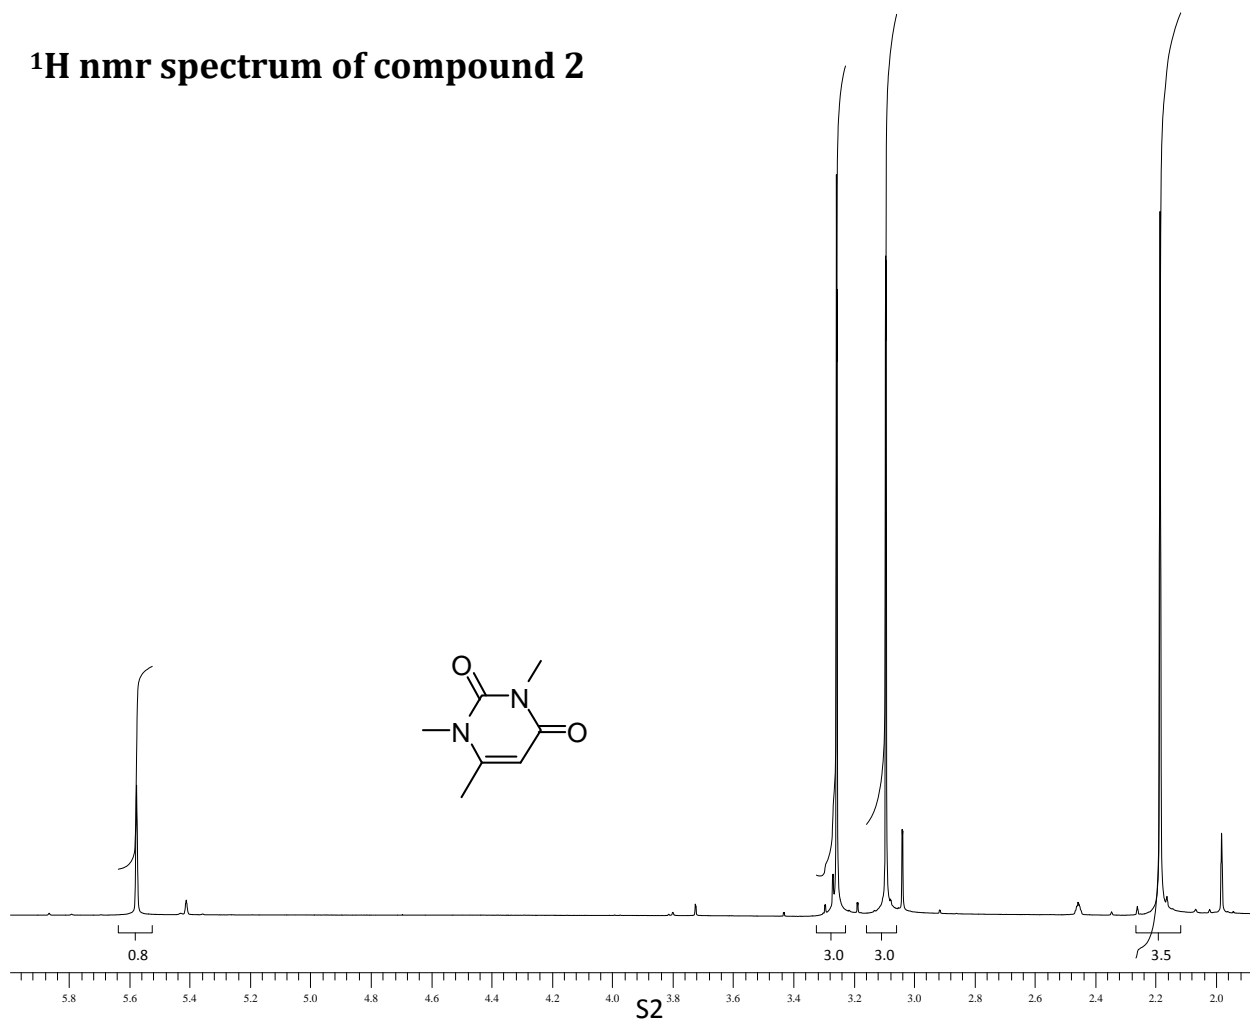

### Low resolution mass spectrum of compound 3

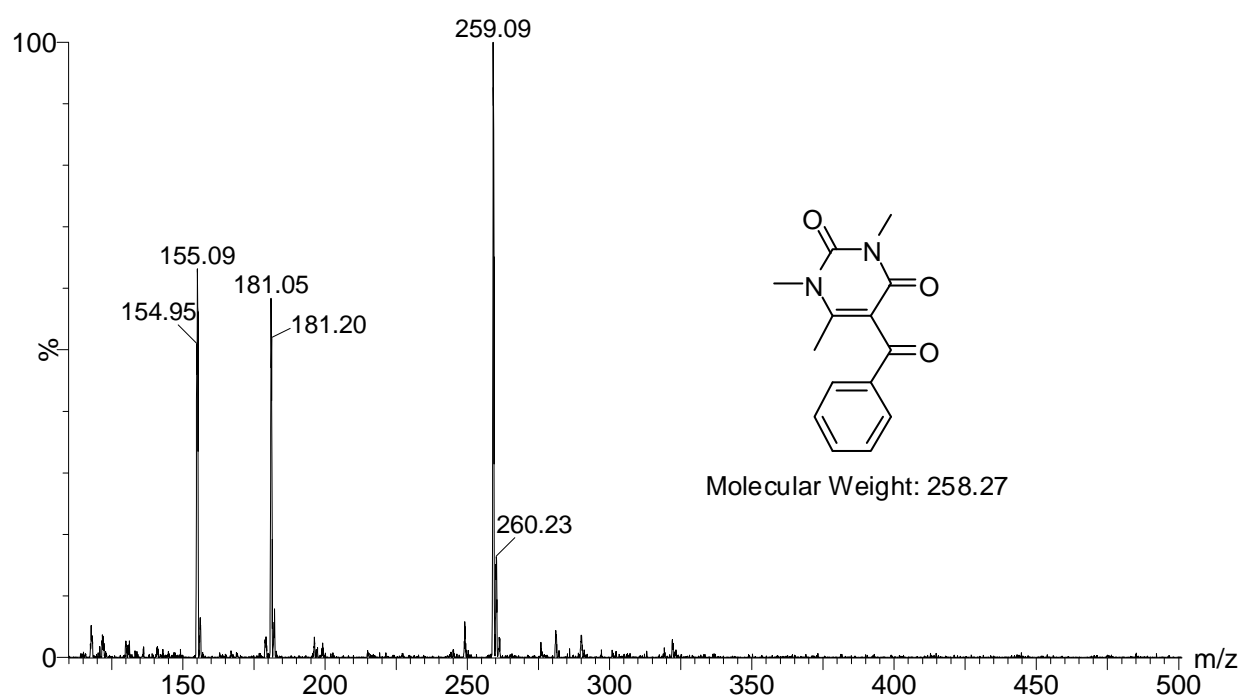

### Low resolution mass spectrum of compound 4

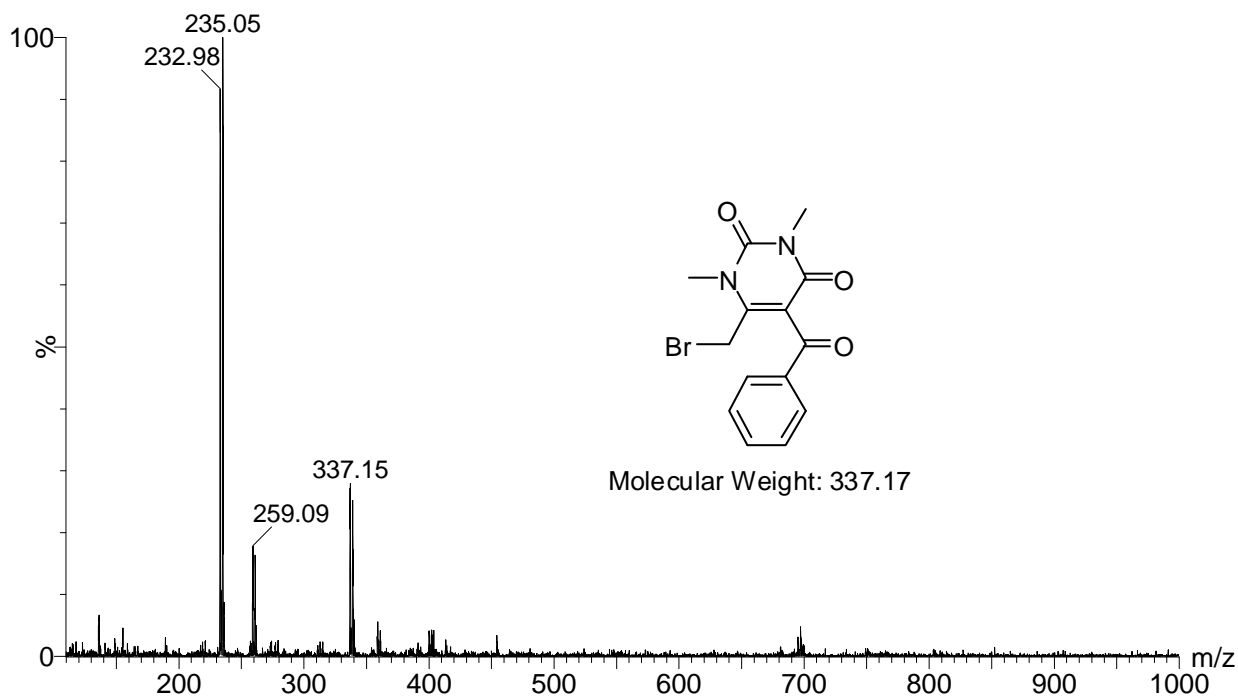

### Low resolution mass spectrum of compound 4 (expanded)

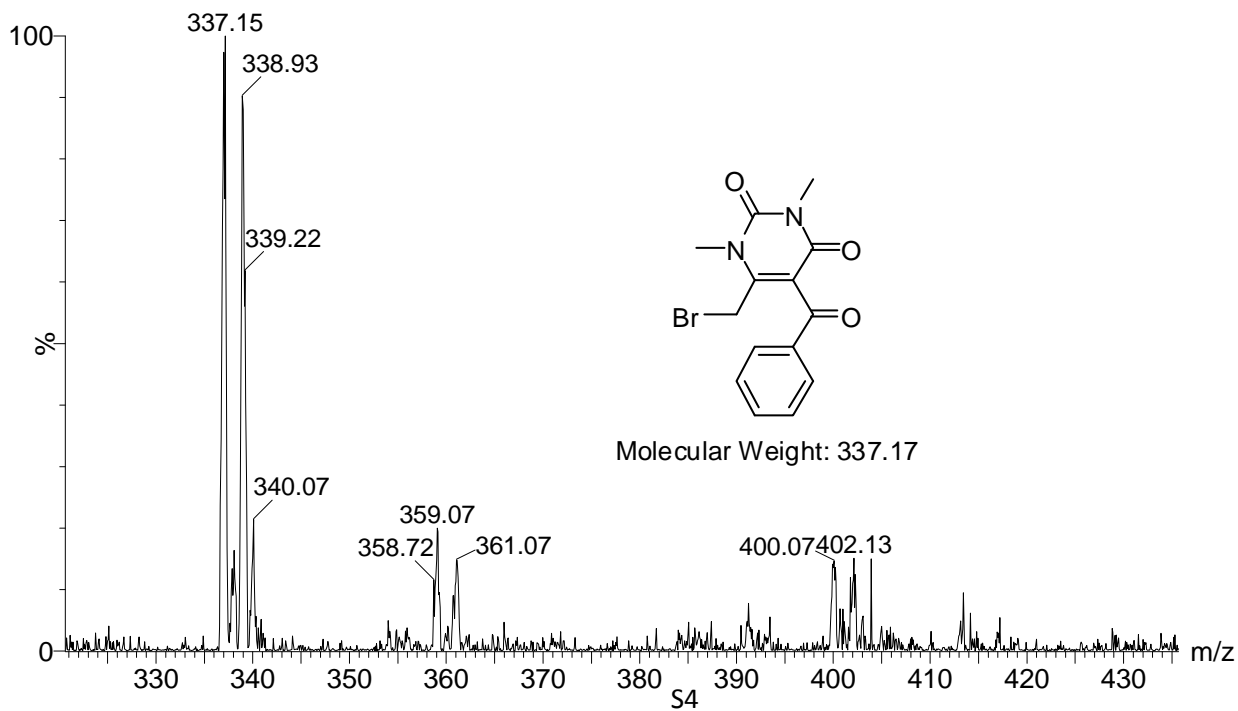

## Low resolution mass spectrum of compound 5

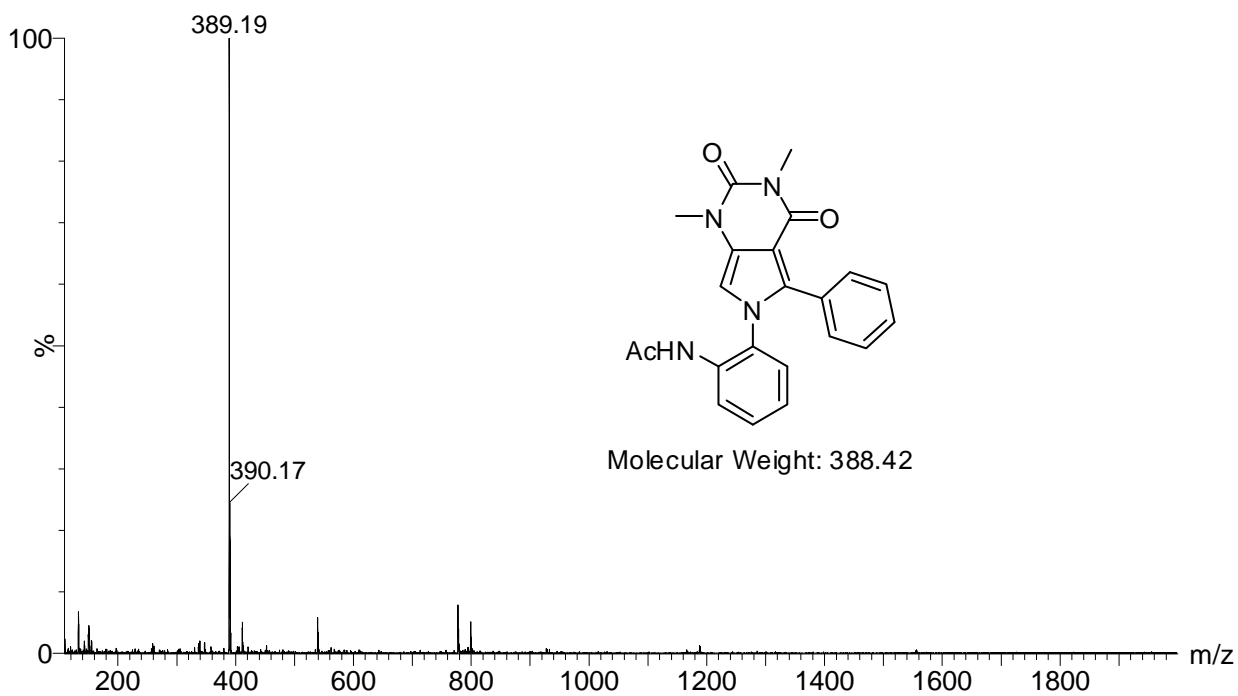

## <sup>1</sup>H nmr spectrum of compound 5

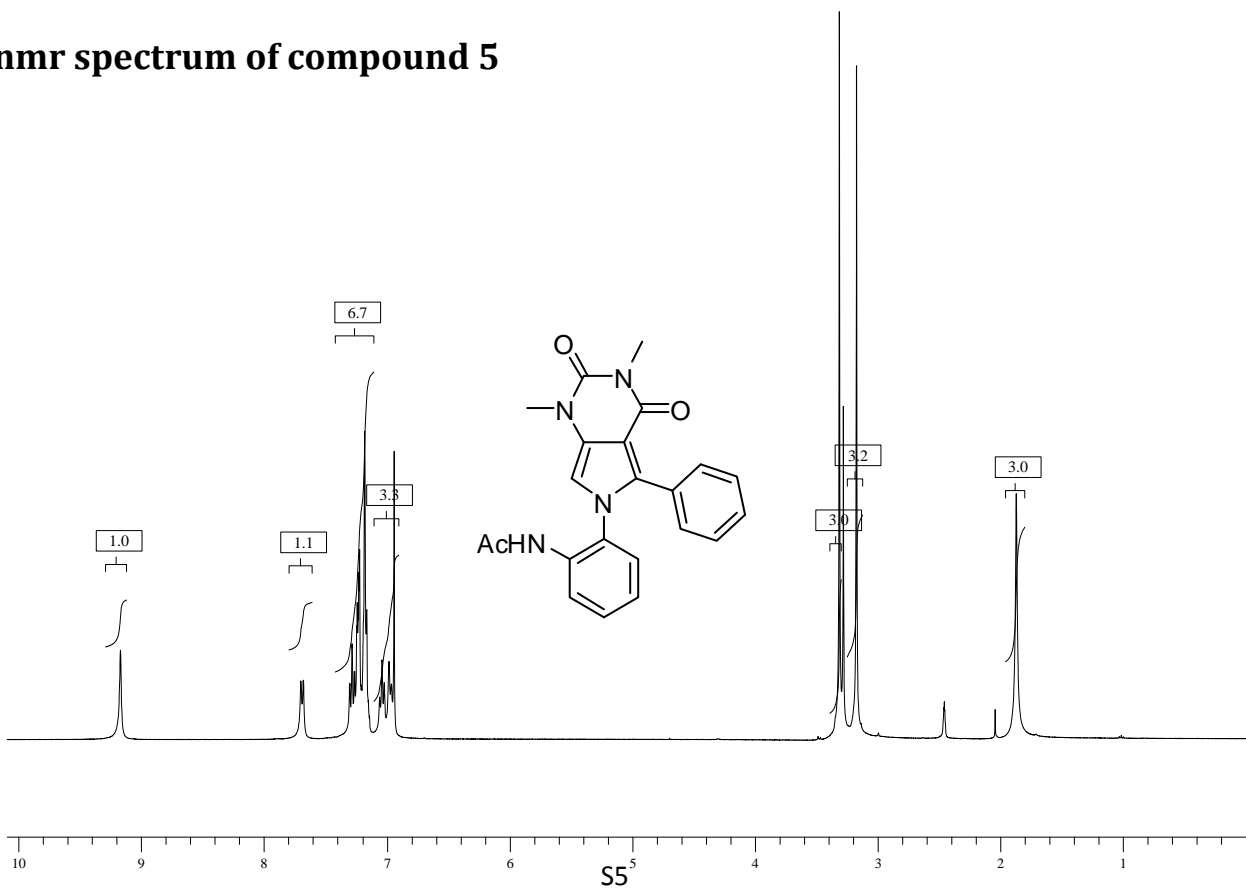

### Low resolution mass spectrum of compound 6

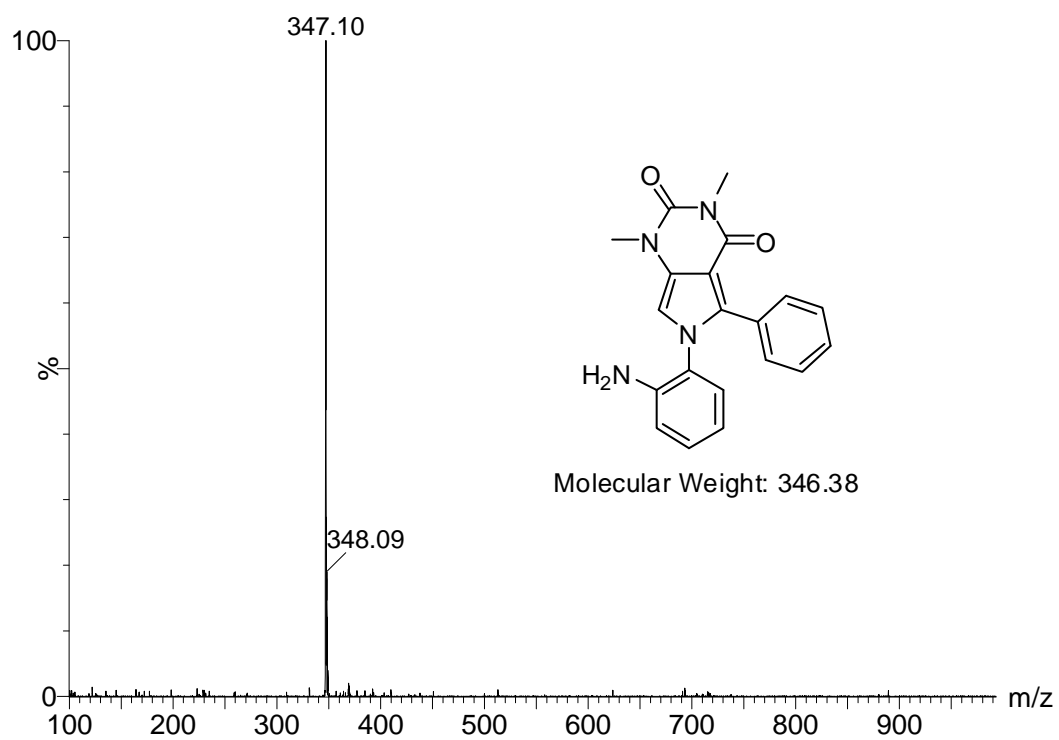

### $^1\text{H}$ nmr spectrum of compound 6 + $\text{D}_2\text{O}$

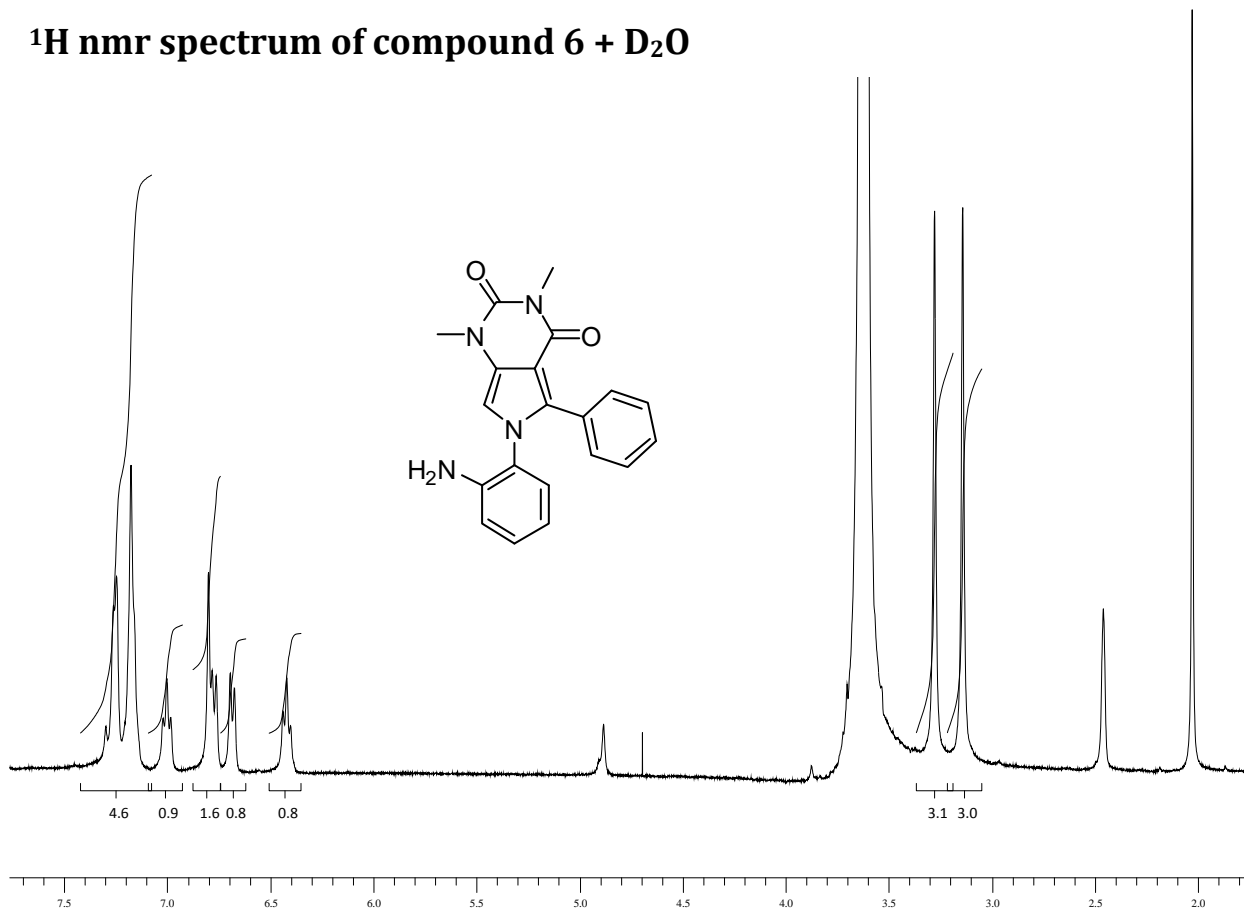

### $^1\text{H}$ nmr spectrum of compound 6

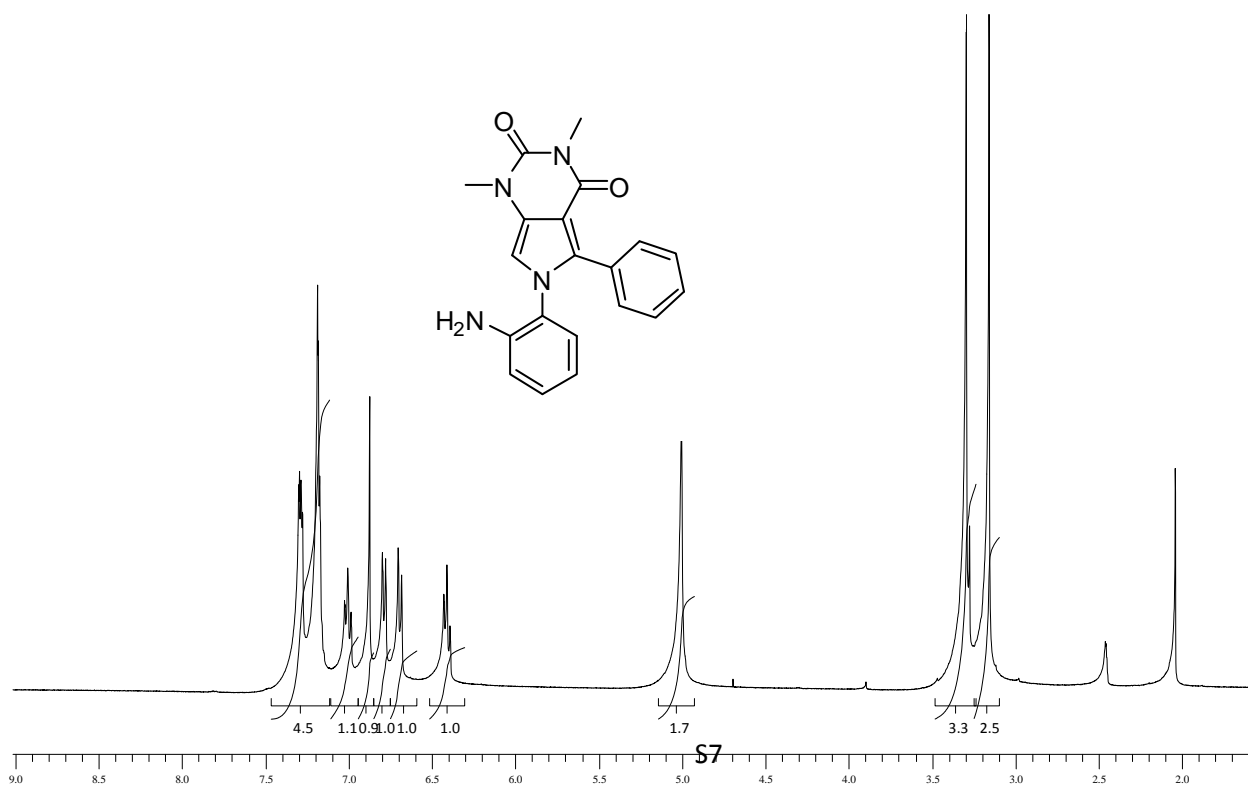

## Low resolution mass spectrum of PPQ-102

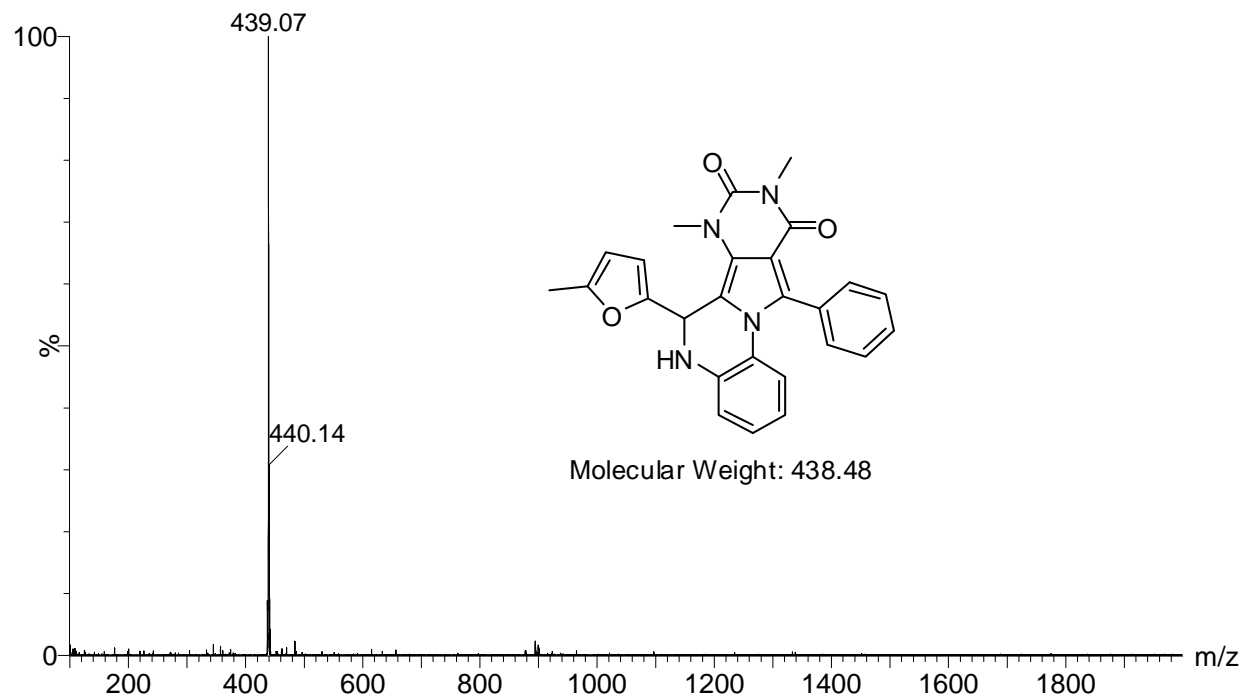

## <sup>13</sup>C nmr spectrum of compound PPQ-102

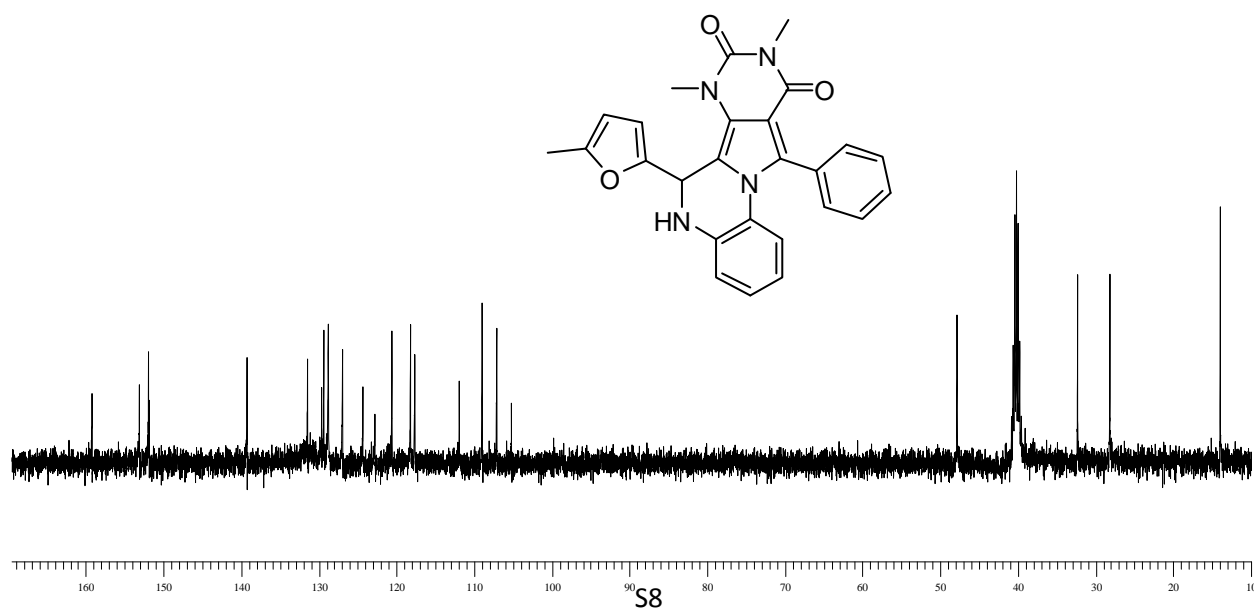



# <sup>1</sup>H nmr spectrum of compound PPQ-102

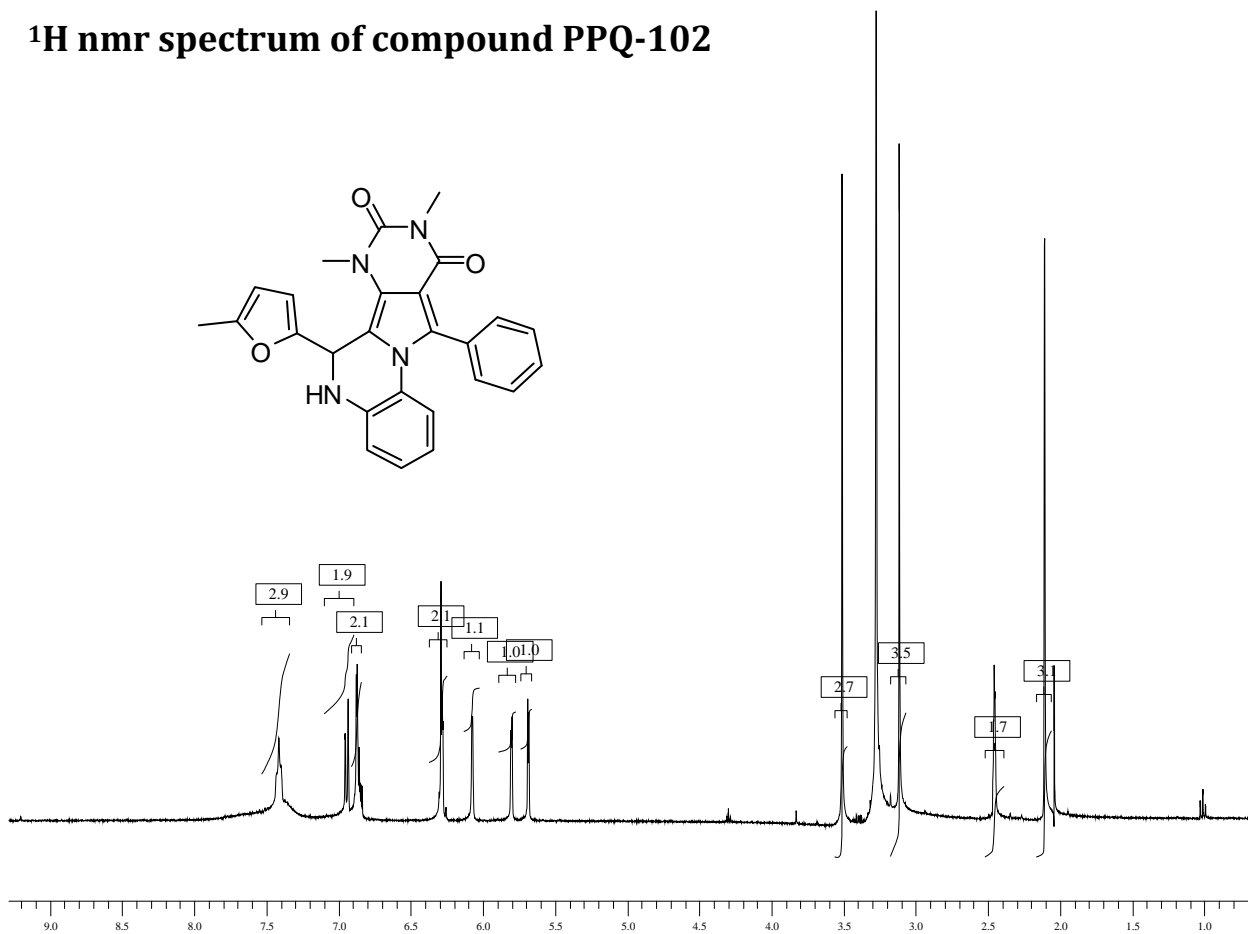

# <sup>1</sup>H nmr spectrum of compound PPQ-102 +D2O

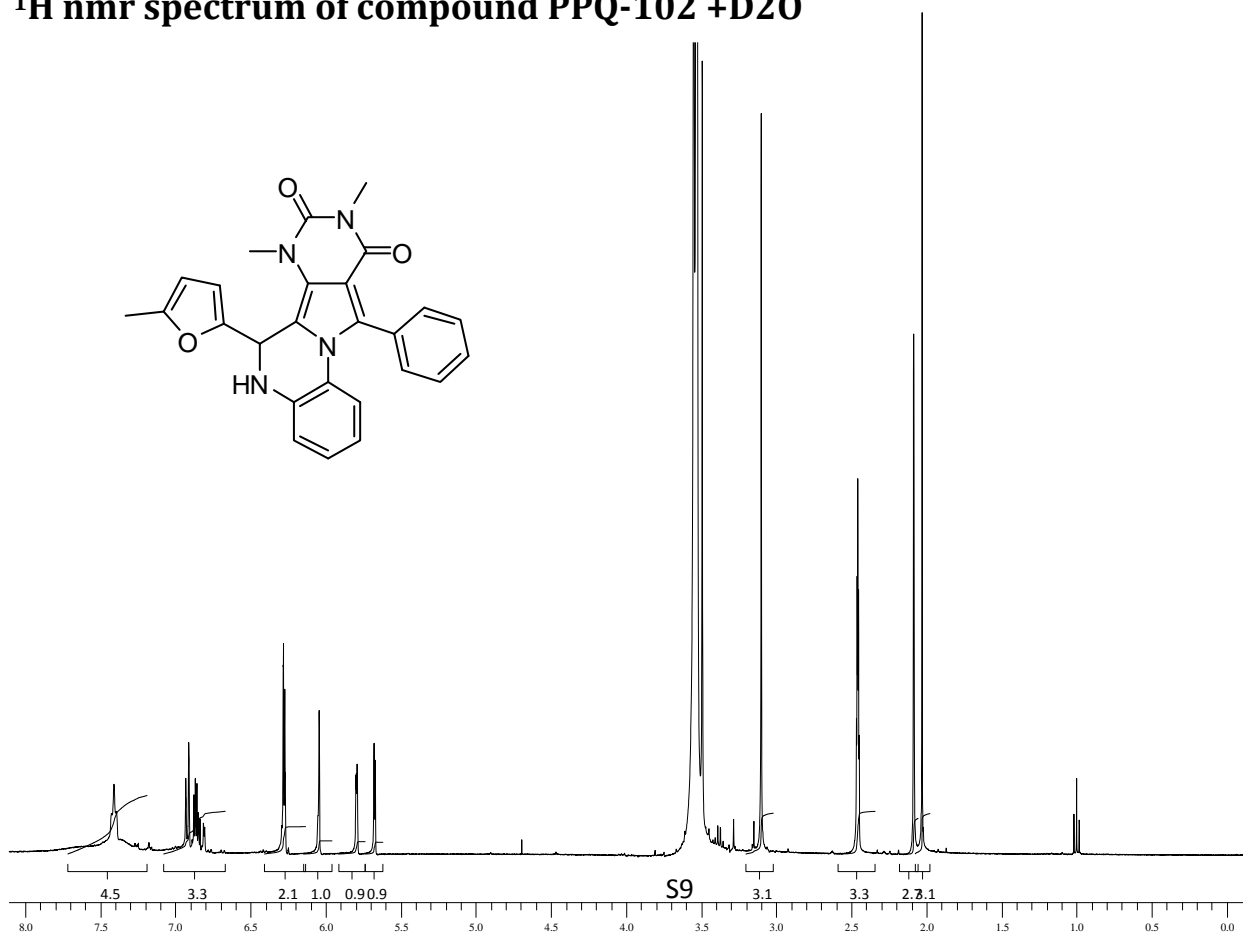

## High resolution mass spectrum of PPQ-102

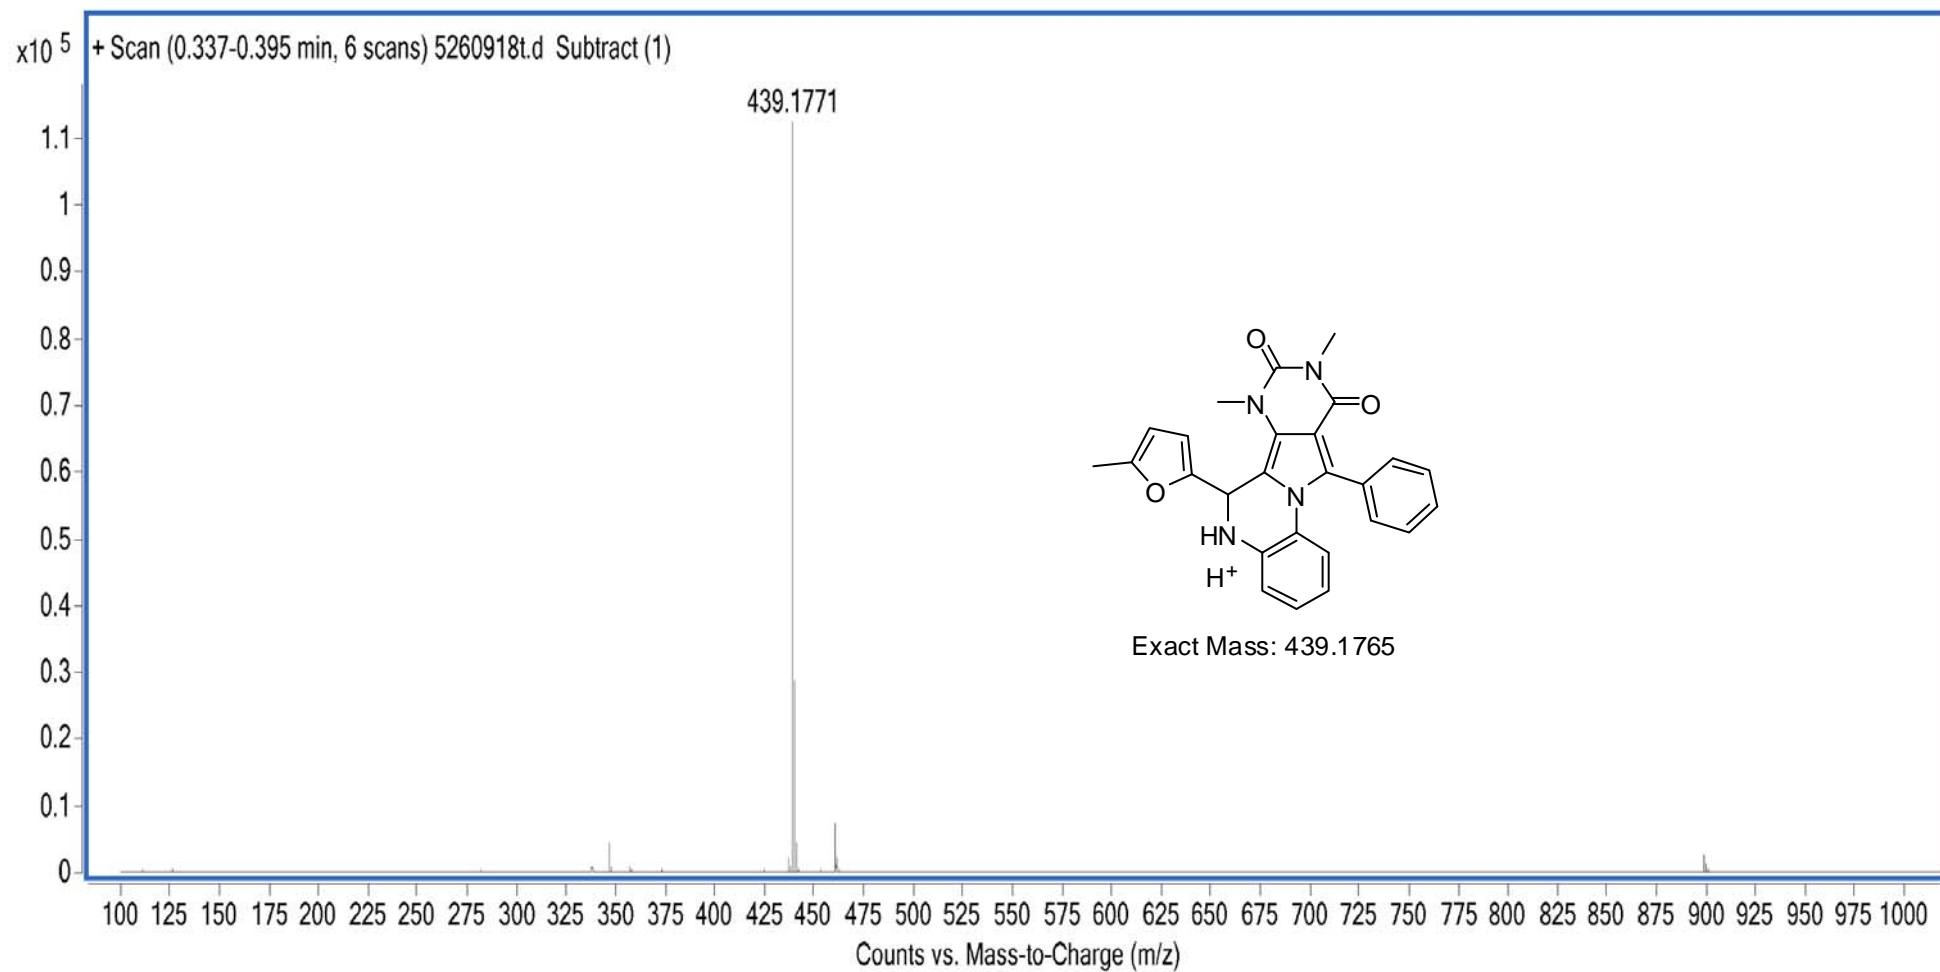

# Low resolution mass spectrum of PPQ-102B

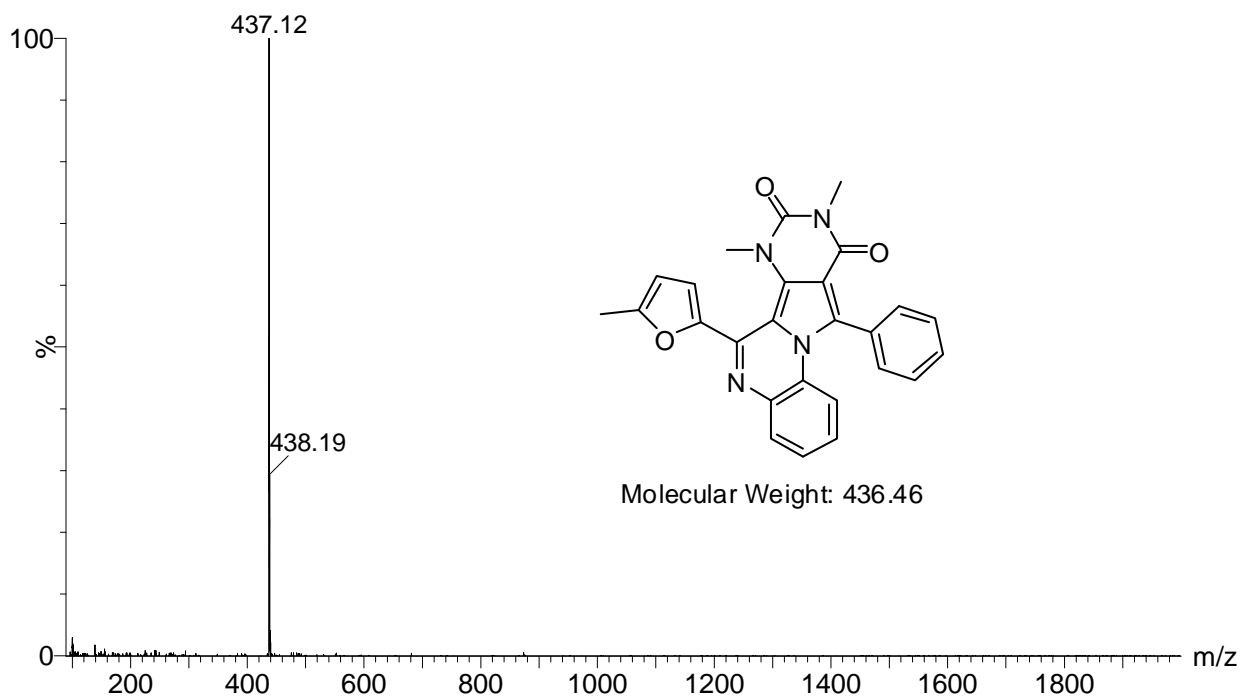

Compounds are ordered according to activity at 25  $\mu$ M.

| Structure | % Inhibition |           | Structure | % Inhibition |           | Structure | % Inhibition |           |
|-----------|--------------|-----------|-----------|--------------|-----------|-----------|--------------|-----------|
|           | 25 $\mu$ M   | 5 $\mu$ M |           | 25 $\mu$ M   | 5 $\mu$ M |           | 25 $\mu$ M   | 5 $\mu$ M |
|           | >95          | >95       |           | 97           | 85        |           | >95          | 62        |
|           | >95          | 46        |           | 96           | 49        |           | 90           | 57        |
|           | >95          | <10       |           | 96           | 64        |           | 90           | 60        |
|           | >95          | 63        |           | 94           | 61        |           | 90           | 84        |
|           | >95          | 50        |           | 94           | 41        |           | 87           | 51        |
|           | >95          | 80        |           | 94           | 71        |           | 87           | 24        |
|           | >95          | 73        |           | 93           | 53        |           | 87           | <10       |
|           | >95          | 70        |           | 93           | 72        |           | 86           | 63        |
|           | >95          | 62        |           | 92           | 61        |           | 86           | 64        |
|           | 84           | 32        |           | 78           | <10       |           | 70           | 18        |
|           | 92           | 36        |           | 83           | 30        |           | 78           | 78        |
|           | 82           | 24        |           | 77           | 34        |           | 67           | 67        |

|                                                                                     |           |           |                                                                                     |           |               |                                                                                      |           |               |
|-------------------------------------------------------------------------------------|-----------|-----------|-------------------------------------------------------------------------------------|-----------|---------------|--------------------------------------------------------------------------------------|-----------|---------------|
| 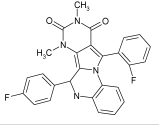   | <b>82</b> | <b>28</b> |    | <b>76</b> | <b>45</b>     |    | <b>67</b> | <b>19</b>     |
|    | <b>81</b> | <b>61</b> |    | <b>76</b> | <b>47</b>     |    | <b>64</b> | <b>5</b>      |
|    | <b>81</b> | <b>53</b> |    | <b>75</b> | <b>31</b>     |    | <b>64</b> | <b>21</b>     |
|    | <b>80</b> | <b>12</b> |    | <b>74</b> | <b>30</b>     |    | <b>64</b> | <b>49</b>     |
|    | <b>80</b> | <b>14</b> |    | <b>74</b> | <b>16</b>     |    | <b>63</b> | <b>&lt;10</b> |
|   | <b>80</b> | <b>67</b> |   | <b>74</b> | <b>15</b>     |   | <b>63</b> | <b>26</b>     |
|  | <b>79</b> | <b>29</b> |  | <b>72</b> | <b>12</b>     |  | <b>62</b> | <b>13</b>     |
|  | <b>61</b> | <b>14</b> |  | <b>50</b> | <b>&lt;10</b> |  | <b>41</b> | <b>&lt;10</b> |
|  | <b>68</b> | <b>42</b> |  | <b>58</b> | <b>13</b>     |  | <b>48</b> | <b>&lt;10</b> |
|  | <b>58</b> | <b>20</b> |  | <b>47</b> | <b>&lt;10</b> |  | <b>41</b> | <b>&lt;10</b> |
|  | <b>58</b> | <b>28</b> |  | <b>47</b> | <b>13</b>     |  | <b>41</b> | <b>&lt;10</b> |
|  | <b>57</b> | <b>21</b> |  | <b>47</b> | <b>&lt;10</b> |  | <b>40</b> | <b>&lt;10</b> |
|  | <b>57</b> | <b>22</b> |  | <b>47</b> | <b>&lt;10</b> |  | <b>40</b> | <b>12</b>     |

|  |           |               |  |           |               |  |           |               |
|--|-----------|---------------|--|-----------|---------------|--|-----------|---------------|
|  | <b>56</b> | <b>32</b>     |  | <b>45</b> | <b>&lt;10</b> |  | <b>39</b> | <b>&lt;10</b> |
|  | <b>56</b> | <b>13</b>     |  | <b>44</b> | <b>&lt;10</b> |  | <b>39</b> | <b>&lt;10</b> |
|  | <b>55</b> | <b>20</b>     |  | <b>44</b> | <b>41</b>     |  | <b>38</b> | <b>&lt;10</b> |
|  | <b>54</b> | <b>11</b>     |  | <b>41</b> | <b>13</b>     |  | <b>38</b> | <b>&lt;10</b> |
|  | <b>38</b> | <b>&lt;10</b> |  | <b>35</b> | <b>23</b>     |  | <b>31</b> | <b>&lt;10</b> |
|  | <b>41</b> | <b>&lt;10</b> |  | <b>38</b> | <b>13</b>     |  | <b>34</b> | <b>&lt;10</b> |
|  | <b>38</b> | <b>&lt;10</b> |  | <b>34</b> | <b>&lt;10</b> |  | <b>31</b> | <b>&lt;10</b> |
|  | <b>37</b> | <b>&lt;10</b> |  | <b>33</b> | <b>&lt;10</b> |  | <b>30</b> | <b>&lt;10</b> |
|  | <b>36</b> | <b>&lt;10</b> |  | <b>33</b> | <b>&lt;10</b> |  | <b>29</b> | <b>&lt;10</b> |
|  | <b>36</b> | <b>&lt;10</b> |  | <b>33</b> | <b>&lt;10</b> |  | <b>29</b> | <b>&lt;10</b> |
|  | <b>36</b> | <b>&lt;10</b> |  | <b>32</b> | <b>&lt;10</b> |  | <b>29</b> | <b>&lt;10</b> |
|  | <b>35</b> | <b>&lt;10</b> |  | <b>31</b> | <b>&lt;10</b> |  | <b>29</b> | <b>&lt;10</b> |
|  | <b>35</b> | <b>&lt;10</b> |  | <b>31</b> | <b>&lt;10</b> |  | <b>29</b> | <b>&lt;10</b> |

|  |           |               |  |           |               |  |           |               |
|--|-----------|---------------|--|-----------|---------------|--|-----------|---------------|
|  | <b>35</b> | <b>&lt;10</b> |  | <b>31</b> | <b>&lt;10</b> |  | <b>29</b> | <b>&lt;10</b> |
|  | <b>28</b> | <b>&lt;10</b> |  | <b>27</b> | <b>&lt;10</b> |  | <b>25</b> | <b>10</b>     |
|  | <b>31</b> | <b>&lt;10</b> |  | <b>28</b> | <b>&lt;10</b> |  | <b>27</b> | <b>&lt;10</b> |
|  | <b>28</b> | <b>&lt;10</b> |  | <b>26</b> | <b>11</b>     |  | <b>25</b> | <b>&lt;10</b> |
|  | <b>27</b> | <b>&lt;10</b> |  | <b>26</b> | <b>&lt;10</b> |  | <b>25</b> | <b>&lt;10</b> |
|  | <b>27</b> | <b>31</b>     |  | <b>26</b> | <b>&lt;10</b> |  | <b>25</b> | <b>&lt;10</b> |
|  | <b>27</b> | <b>&lt;10</b> |  | <b>26</b> | <b>&lt;10</b> |  | <b>25</b> | <b>&lt;10</b> |
|  | <b>27</b> | <b>&lt;10</b> |  | <b>26</b> | <b>&lt;10</b> |  | <b>24</b> | <b>&lt;10</b> |
|  | <b>27</b> | <b>&lt;10</b> |  | <b>26</b> | <b>&lt;10</b> |  | <b>24</b> | <b>&lt;10</b> |
|  | <b>27</b> | <b>&lt;10</b> |  | <b>25</b> | <b>&lt;10</b> |  | <b>24</b> | <b>&lt;10</b> |
|  | <b>27</b> | <b>&lt;10</b> |  | <b>25</b> | <b>&lt;10</b> |  | <b>24</b> | <b>&lt;10</b> |
|  | <b>24</b> | <b>&lt;10</b> |  | <b>23</b> | <b>&lt;10</b> |  | <b>22</b> | <b>&lt;10</b> |
|  | <b>25</b> | <b>&lt;10</b> |  | <b>23</b> | <b>&lt;10</b> |  | <b>23</b> | <b>14</b>     |

|  |           |               |  |           |               |  |           |               |
|--|-----------|---------------|--|-----------|---------------|--|-----------|---------------|
|  | <b>23</b> | <b>&lt;10</b> |  | <b>23</b> | <b>&lt;10</b> |  | <b>21</b> | <b>&lt;10</b> |
|  | <b>23</b> | <b>&lt;10</b> |  | <b>22</b> | <b>&lt;10</b> |  | <b>21</b> | <b>&lt;10</b> |
|  | <b>23</b> | <b>&lt;10</b> |  | <b>22</b> | <b>&lt;10</b> |  | <b>21</b> | <b>&lt;10</b> |
|  | <b>23</b> | <b>&lt;10</b> |  | <b>22</b> | <b>&lt;10</b> |  | <b>21</b> | <b>&lt;10</b> |
|  | <b>23</b> | <b>&lt;10</b> |  | <b>22</b> | <b>&lt;10</b> |  | <b>20</b> | <b>&lt;10</b> |
|  | <b>23</b> | <b>&lt;10</b> |  | <b>22</b> | <b>&lt;10</b> |  | <b>20</b> | <b>&lt;10</b> |
|  | <b>23</b> | <b>&lt;10</b> |  | <b>22</b> | <b>&lt;10</b> |  | <b>20</b> | <b>&lt;10</b> |
|  | <b>23</b> | <b>&lt;10</b> |  | <b>22</b> | <b>&lt;10</b> |  | <b>20</b> | <b>&lt;10</b> |
|  | <b>20</b> | <b>&lt;10</b> |  | <b>19</b> | <b>&lt;10</b> |  | <b>18</b> | <b>&lt;10</b> |
|  | <b>22</b> | <b>&lt;10</b> |  | <b>20</b> | <b>&lt;10</b> |  | <b>19</b> | <b>&lt;10</b> |
|  | <b>20</b> | <b>&lt;10</b> |  | <b>19</b> | <b>&lt;10</b> |  | <b>18</b> | <b>&lt;10</b> |
|  | <b>20</b> | <b>&lt;10</b> |  | <b>19</b> | <b>&lt;10</b> |  | <b>18</b> | <b>&lt;10</b> |
|  | <b>20</b> | <b>&lt;10</b> |  | <b>19</b> | <b>&lt;10</b> |  | <b>18</b> | <b>&lt;10</b> |



|  |           |               |  |           |               |  |           |               |
|--|-----------|---------------|--|-----------|---------------|--|-----------|---------------|
|  | <b>20</b> | <b>&lt;10</b> |  | <b>19</b> | <b>&lt;10</b> |  | <b>18</b> | <b>&lt;10</b> |
|  | <b>20</b> | <b>&lt;10</b> |  | <b>19</b> | <b>&lt;10</b> |  | <b>18</b> | <b>&lt;10</b> |
|  | <b>20</b> | <b>&lt;10</b> |  | <b>19</b> | <b>&lt;10</b> |  | <b>18</b> | <b>&lt;10</b> |
|  | <b>20</b> | <b>&lt;10</b> |  | <b>19</b> | <b>&lt;10</b> |  | <b>18</b> | <b>&lt;10</b> |
|  | <b>19</b> | <b>&lt;10</b> |  | <b>19</b> | <b>&lt;10</b> |  | <b>18</b> | <b>&lt;10</b> |
|  | <b>18</b> | <b>&lt;10</b> |  | <b>76</b> | <b>16</b>     |  | <b>15</b> | <b>&lt;10</b> |
|  | <b>18</b> | <b>&lt;10</b> |  | <b>17</b> | <b>&lt;10</b> |  | <b>16</b> | <b>&lt;10</b> |
|  | <b>17</b> | <b>&lt;10</b> |  | <b>16</b> | <b>&lt;10</b> |  | <b>14</b> | <b>&lt;10</b> |
|  | <b>17</b> | <b>&lt;10</b> |  | <b>16</b> | <b>&lt;10</b> |  | <b>14</b> | <b>&lt;10</b> |
|  | <b>17</b> | <b>&lt;10</b> |  | <b>15</b> | <b>&lt;10</b> |  | <b>14</b> | <b>&lt;10</b> |
|  | <b>17</b> | <b>&lt;10</b> |  | <b>15</b> | <b>&lt;10</b> |  | <b>14</b> | <b>&lt;10</b> |
|  | <b>17</b> | <b>&lt;10</b> |  | <b>15</b> | <b>&lt;10</b> |  | <b>14</b> | <b>&lt;10</b> |
|  | <b>16</b> | <b>&lt;10</b> |  | <b>15</b> | <b>&lt;10</b> |  | <b>14</b> | <b>&lt;10</b> |

|  |               |               |  |               |               |  |               |               |
|--|---------------|---------------|--|---------------|---------------|--|---------------|---------------|
|  | <b>16</b>     | <b>&lt;10</b> |  | <b>15</b>     | <b>&lt;10</b> |  | <b>14</b>     | <b>&lt;10</b> |
|  | <b>16</b>     | <b>10</b>     |  | <b>15</b>     | <b>&lt;10</b> |  | <b>14</b>     | <b>&lt;10</b> |
|  | <b>14</b>     | <b>&lt;10</b> |  | <b>13</b>     | <b>&lt;10</b> |  | <b>11</b>     | <b>&lt;10</b> |
|  | <b>15</b>     | <b>&lt;10</b> |  | <b>14</b>     | <b>&lt;10</b> |  | <b>15</b>     | <b>13</b>     |
|  | <b>14</b>     | <b>&lt;10</b> |  | <b>12</b>     | <b>&lt;10</b> |  | <b>11</b>     | <b>&lt;10</b> |
|  | <b>14</b>     | <b>&lt;10</b> |  | <b>12</b>     | <b>&lt;10</b> |  | <b>&lt;10</b> | <b>&lt;10</b> |
|  | <b>13</b>     | <b>&lt;10</b> |  | <b>12</b>     | <b>&lt;10</b> |  | <b>&lt;10</b> | <b>&lt;10</b> |
|  | <b>13</b>     | <b>&lt;10</b> |  | <b>12</b>     | <b>&lt;10</b> |  | <b>&lt;10</b> | <b>&lt;10</b> |
|  | <b>13</b>     | <b>&lt;10</b> |  | <b>12</b>     | <b>&lt;10</b> |  | <b>&lt;10</b> | <b>&lt;10</b> |
|  | <b>13</b>     | <b>&lt;10</b> |  | <b>12</b>     | <b>&lt;10</b> |  | <b>&lt;10</b> | <b>&lt;10</b> |
|  | <b>13</b>     | <b>&lt;10</b> |  | <b>12</b>     | <b>&lt;10</b> |  | <b>&lt;10</b> | <b>&lt;10</b> |
|  | <b>13</b>     | <b>&lt;10</b> |  | <b>12</b>     | <b>&lt;10</b> |  | <b>&lt;10</b> | <b>&lt;10</b> |
|  | <b>13</b>     | <b>&lt;10</b> |  | <b>&lt;10</b> | <b>&lt;10</b> |  | <b>&lt;10</b> | <b>&lt;10</b> |
|  | <b>&lt;10</b> | <b>&lt;10</b> |  | <b>&lt;10</b> | <b>&lt;10</b> |  | <b>21</b>     | <b>&lt;10</b> |

|  |     |     |  |     |     |  |     |     |
|--|-----|-----|--|-----|-----|--|-----|-----|
|  | <10 | 11  |  | <10 | <10 |  | <10 | <10 |
|  | <10 | <10 |  | <10 | <10 |  | <10 | <10 |
|  | <10 | <10 |  | <10 | <10 |  | <10 | <10 |
|  | <10 | <10 |  | <10 | <10 |  | <10 | <10 |
|  | <10 | <10 |  | <10 | <10 |  | <10 | <10 |
|  | <10 | <10 |  | <10 | <10 |  | <10 | <10 |
|  | <10 | <10 |  | <10 | <10 |  | <10 | <10 |
|  | <10 | <10 |  | <10 | <10 |  | <10 | <10 |
|  | <10 | <10 |  | <10 | <10 |  | <10 | <10 |
|  | <10 | <10 |  | <10 | <10 |  | <10 | <10 |
|  | <10 | <10 |  | <10 | <10 |  | <10 | <10 |
|  | <10 | <10 |  | <10 | <10 |  | <10 | <10 |
|  | <10 | <10 |  | <10 | <10 |  | <10 | <10 |
|  | <10 | <10 |  | <10 | <10 |  | <10 | <10 |

|  |     |     |  |     |     |  |     |     |
|--|-----|-----|--|-----|-----|--|-----|-----|
|  | <10 | <10 |  | <10 | <10 |  | <10 | <10 |
|  | <10 | <10 |  | <10 | <10 |  | 30  | <10 |
|  | <10 | <10 |  | <10 | <10 |  | 16  | <10 |
|  | <10 | <10 |  | <10 | <10 |  | 14  | <10 |
|  | <10 | <10 |  | <10 | <10 |  | 78  | <10 |
|  | <10 | <10 |  | <10 | <10 |  | <10 | <10 |
|  | <10 | <10 |  | <10 | <10 |  | <10 | <10 |
|  | <10 | <10 |  | <10 | <10 |  | <10 | <10 |
|  | <10 | <10 |  | <10 | <10 |  |     |     |
